# Supplementary material
Source: PubMed Central journal article supplement (PMC2709377)
Supplement: supp_M109.005082_jbc.M109.005082-1.pdf [file supp_M109.005082_jbc.M109.005082-1.pdf]

## Supplementary Figure 1

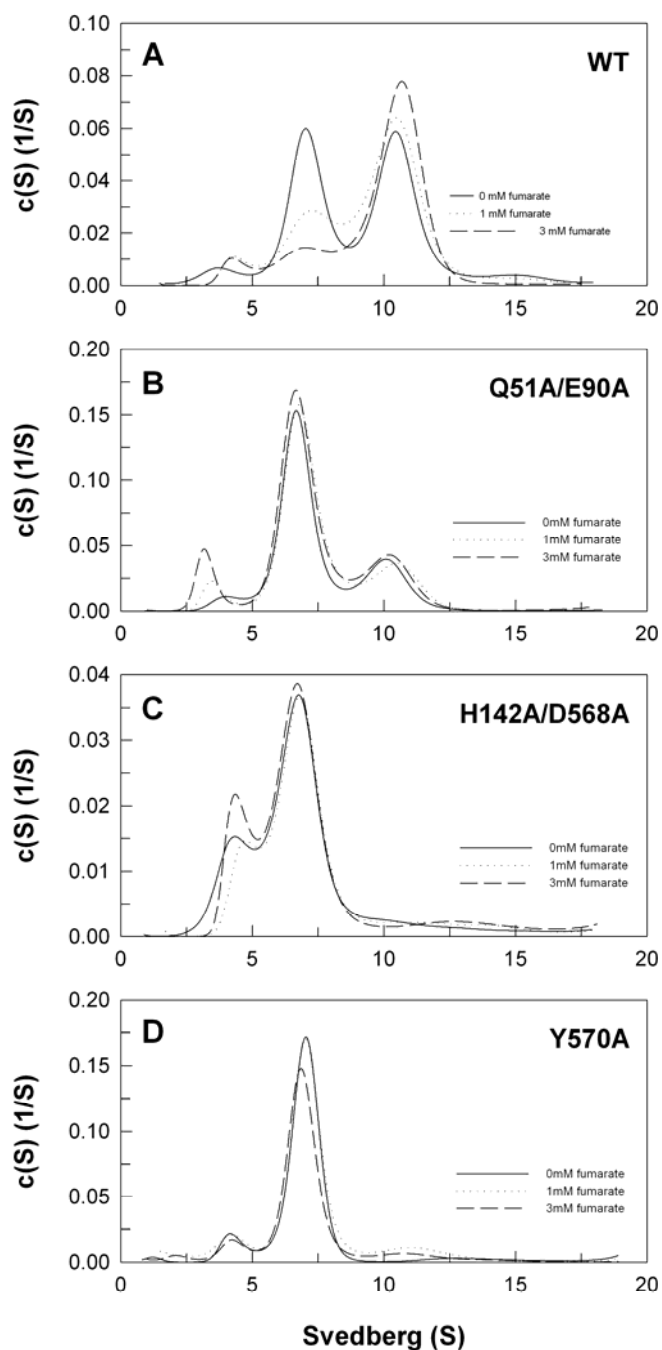

**Figure S1. Continuous sedimentation coefficient distribution of the WT and interface mutant m-NAD(P)-ME.** A: WT m-NAD(P)-ME; B: Q51A/E90A m-NAD(P)-ME; C: H142A/D568A m-NAD(P)-ME; D: Y570A m-NAD(P)-ME. Fumarate concentrations used in this experiment were 0, 1 and 3 mM.

## Supplementary Figure 2

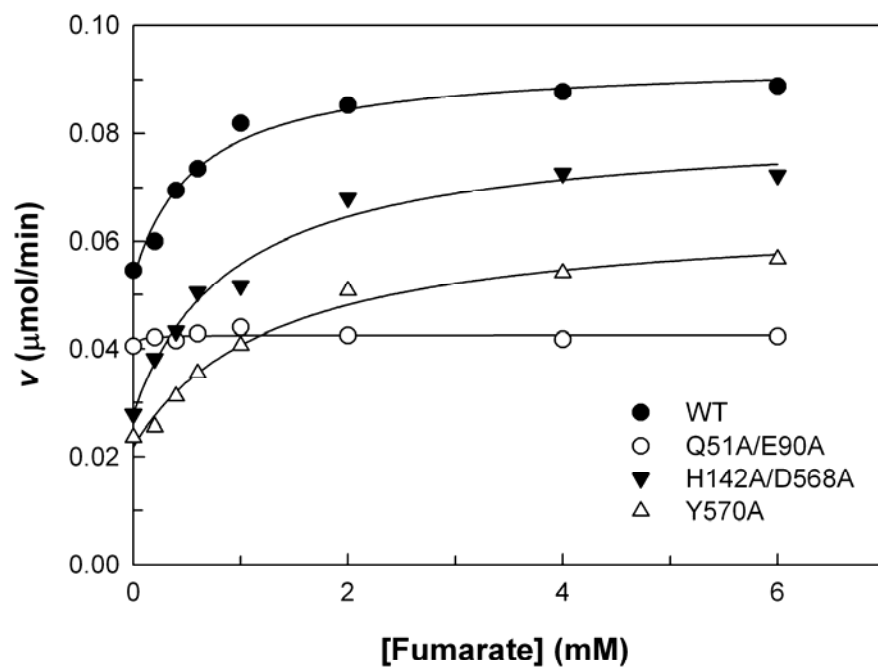

**Figure S2. Activating effect of fumarate for the WT and interface mutant m-NAD(P)-ME.**
